# Supplementary material
Source: PubMed Central journal article supplement (PMC3627292)
Supplement: NIHMS52852-supplement-Suppl__Fig__and_Tables.pdf [file NIHMS52852-supplement-Suppl__Fig__and_Tables.pdf]

## SUPPLEMENTARY FIGURES AND LEGENDS

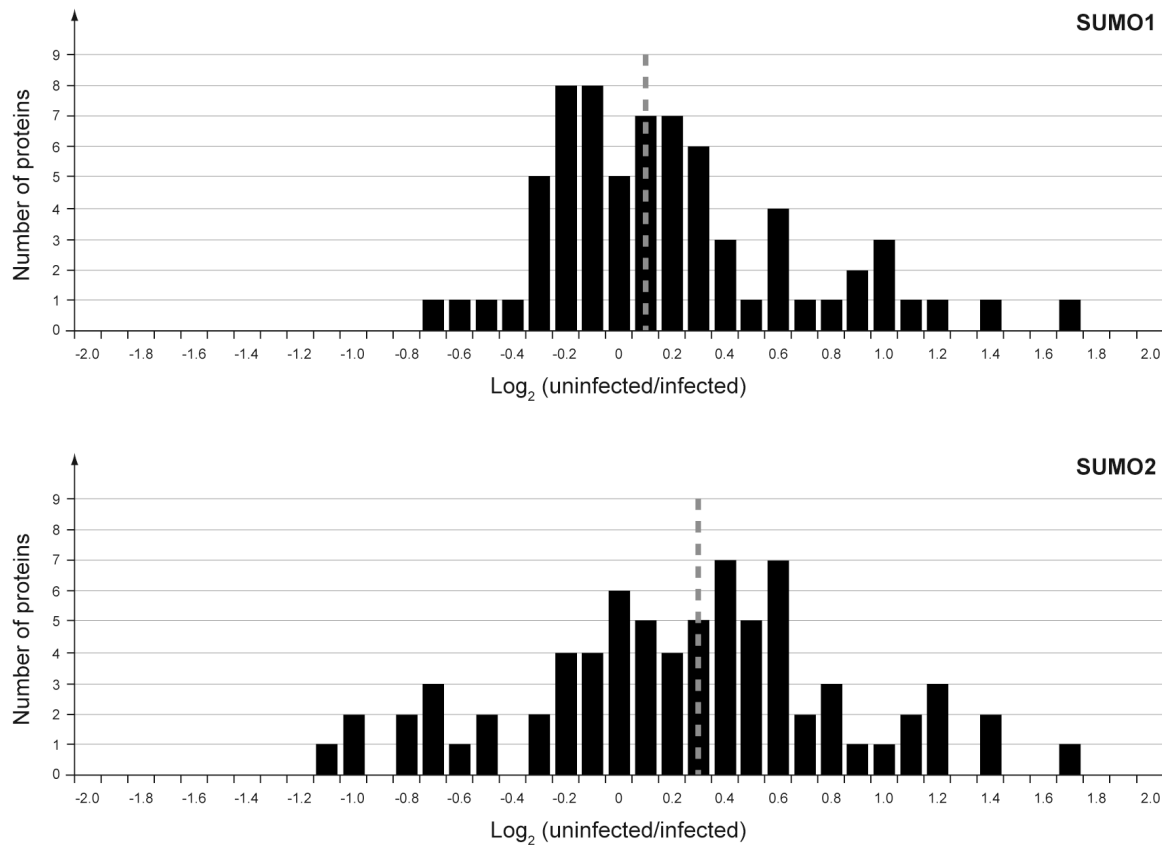

**Supplementary Figure 1 : Proteomics analysis of SILAC-labeled SUMOylated proteins from uninfected cells and cells infected with *L. monocytogenes*.**

HeLa cells transfected with His-tagged SUMO expression vectors (either SUMO1 or SUMO2 in two independent experiments) were cultivated in “heavy” or “light” DMEM arginine SILAC medium containing <sup>13</sup>C<sub>6</sub> or <sup>12</sup>C<sub>6</sub> arginine respectively. Cells cultured in the “heavy” medium were infected with a super invasive strain of *L. monocytogenes* (BUG1641<sup>1</sup>), whereas cells cultured in the “light” medium served as a control population. After 1 hour of infection, cells were harvested, mixed and lysed in buffer A (50 mM Na<sub>2</sub>HPO<sub>4</sub>/NaH<sub>2</sub>PO<sub>4</sub>, pH 8.0, 150 mM NaCl, 1% NP-40, 0.5% Na-deoxycholate, 0.1% SDS, 0.05% Tween 20, 10 mM imidazole, 20 mM N-ethylmaleimide). His-tagged SUMOylated proteins were then loaded on Ni-NTA magnetic agarose beads (QIAGEN), washed with buffer B (50 mM Na<sub>2</sub>HPO<sub>4</sub>/NaH<sub>2</sub>PO<sub>4</sub>, pH 8.0, 150 mM NaCl, 0.5% Na-deoxycholate, 0.1% SDS, 0.05% Tween 20, 20 mM imidazole, 20 mM N-ethylmaleimide) and eluted with buffer C (50 mM Na<sub>2</sub>HPO<sub>4</sub>/NaH<sub>2</sub>PO<sub>4</sub>, pH 8.0, 150 mM NaCl, 0.5% Na-deoxycholate, 0.1% SDS, 250 mM

imidazole, 20 mM N-ethylmaleimide). The eluted protein mixture was dialyzed against a buffer composed of 50 mM Na<sub>2</sub>HPO<sub>4</sub>/NaH<sub>2</sub>PO<sub>4</sub>, pH 8.0, 150 mM NaCl and proteins were digested overnight with trypsin. For both analyses, the peptide mixtures were separated on RP-HPLC and the collected fractions were analysed by LC-MS/MS on an Agilent XCT ion trap instrument. Mascot searches were performed in the human Swiss-Prot and TrEMBL databases and identified peptides ending on arginine residues were quantified manually by calculating their light/heavy (=uninfected/infected) ratio from the MS peptide envelope intensities. As such, based on the average ratio of their peptides, 69 and 73 proteins were quantified in the SUMO-1 and SUMO-2 analysis respectively.

Histograms correspond to the distribution of the log<sub>2</sub> values of the uninfected/infected ratios of all quantified proteins. In both analyses, most proteins carried positive log<sub>2</sub> uninfected/infected ratios. This is reflected by the log<sub>2</sub> median of all protein ratios which was found to be 0.16 and 0.33 for the SUMO1 and SUMO2 analysis respectively, indicating that less SUMOylated proteins were isolated from *L. monocytogenes* infected cells compared to uninfected cells.

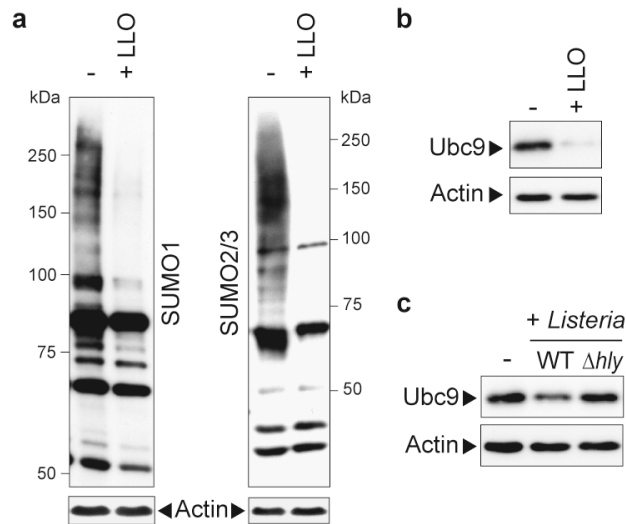

**Supplementary Figure 2 : Effect of *Listeria* infection and LLO treatment on Jeg3 cells.**

a, Decrease in SUMO1 and SUMO2/3-conjugated protein levels in Jeg3 cells (placental epithelial cells) incubated with 3 nM LLO for 20 min. b, Decrease in Ubc9 level in Jeg3 cells incubated with 3 nM LLO for 20 min. c, Ubc9 level is decreased in Jeg3 cells infected for 3 hours with *L. monocytogenes* (WT) but not in cells infected with a  $\Delta hly$  mutant.

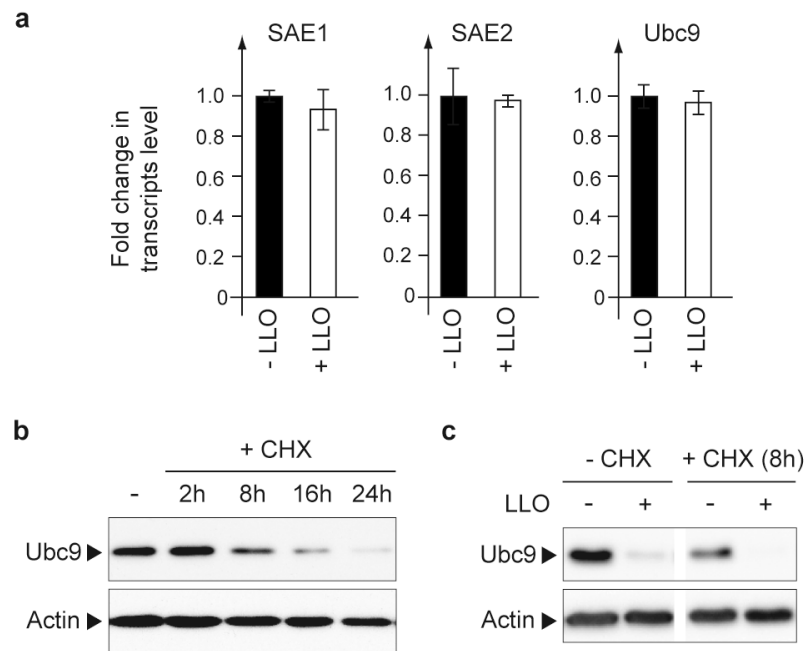

### Supplementary Figure 3 : LLO acts on Ubc9 at the post-translational level.

a, The global transcriptional response of HeLa cells incubated with LLO for 20 min was analysed using human genome Affymetrix chips designed to quantify the expression level of 47,000 transcripts<sup>2</sup>. As highlighted in the figure, SAE1, SAE2 and Ubc9 genes were not differentially expressed in HeLa cells incubated with LLO compared to untreated cells (n=3; error bars, s.d.). b, Immunoblot analysis of HeLa cells treated with 100  $\mu$ M cycloheximide (CHX), showing that Ubc9 is a relatively stable protein with a half-life >8 hours. c, Immunoblot analysis of HeLa cells pretreated with 100  $\mu$ M DMSO (-CHX) or 100  $\mu$ M cycloheximide (+CHX) for 8 hours, and incubated with 3 nM LLO for 20 min. Inhibition of cellular protein synthesis by cycloheximide does not prevent the decrease in Ubc9 level triggered by LLO.

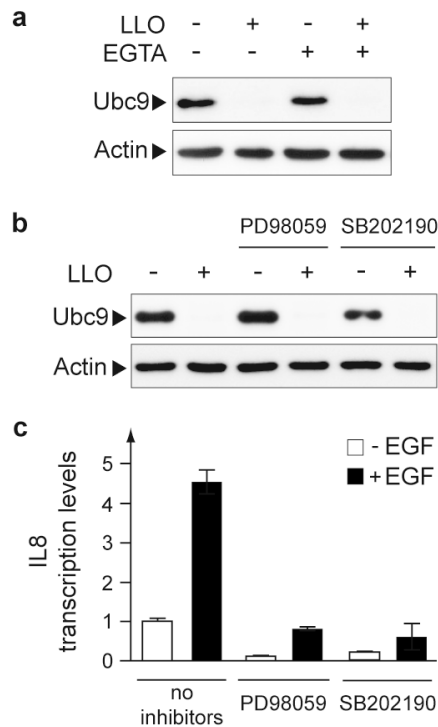

**Supplementary Figure 4 : LLO-mediated degradation of Ubc9 is independent of calcium influxes and MAPK activation.**

a, Immunoblot analysis of HeLa cells incubated with 3 nM LLO for 20 min in control medium or in medium supplemented with 20 mM EGTA, a calcium chelator blocking  $Ca^{2+}$  influx induced by LLO pores. Blockage of calcium influx from extracellular medium does not prevent Ubc9 degradation upon treatment with LLO. b, Immunoblot analysis of HeLa cells pretreated for 1 hour with 50  $\mu$ M PD98059 (an inhibitor of MEK1/2 kinases) or 10  $\mu$ M SB202190 (an inhibitor of p38 MAPK) and incubated with 3 nM LLO for 20 min. Inhibition of MAPK activities does not prevent Ubc9 degradation upon treatment with LLO. c, Control of MAPK inhibitor activities by analysis of IL8 expression, a MAPK-regulated gene<sup>3</sup>. HeLa cells were treated with MAPK inhibitors (PD98059 and SB202190, as above) and then incubated with 50  $\mu$ g/mL EGF for 30 minutes. RNA was isolated using the RNeasy kit (Qiagen), and cDNA was synthesized using 1  $\mu$ g RNA in an RT reaction (iscript cDNA synthesis kit, Biorad). Quantitative PCR specific for IL8 (using 5'-ACTTTCAGAGACAGCAGAGCAC-3' and 5'-CCAGCTTGGAAGTCATGTTTAC-3' primers) or GAPDH, an internal control gene (using 5'-ACTCACCTGCCCTCAATATC-3' and 5'-AGACAGTGTGCCTTTCATTCC-3' primers), were performed on a myIQ cycler (Biorad). Ratios of IL8/GAPDH transcription levels are indicated (means and standard deviations from qPCR duplicates).

## SUPPLEMENTARY TABLES

**Supplementary Table 1 : List of quantified proteins from the SILAC/SUMO1 experiment.**

| Accession | Start | End  | Identified peptide    | # spectra | peptide ratio (light/heavy) | protein ratio (light/heavy) | Protein name                                                      | isoforms                               |
|-----------|-------|------|-----------------------|-----------|-----------------------------|-----------------------------|-------------------------------------------------------------------|----------------------------------------|
| Q04446    | 566   | 576  | QFHLTDDLLR            | 1         | 0.71                        | 0.71                        | 1,4-alpha-glucan-branching enzyme                                 |                                        |
| P62263    | 129   | 141  | IEDVTPIPSDSTR         | 1         | 2.10                        | 2.10                        | 40S ribosomal protein S14                                         |                                        |
| P23396    | 19    | 27   | AELNEFLTR             | 1         | 1.03                        | 1.03                        | 40S ribosomal protein S3                                          |                                        |
| P62701    | 192   | 198  | IGVITNR               | 1         | 0.97                        | 0.97                        | 40S ribosomal protein S4, X isoform                               |                                        |
| P46776    | 95    | 105  | TGAAPIIDVVR           | 1         | 0.96                        | 0.96                        | 60S ribosomal protein L27a                                        |                                        |
| O43707    | 67    | 79   | AGTQIENIDEDFR         | 1         | 0.99                        | 0.99                        | Alpha-actinin-4                                                   |                                        |
| P08243    | 50    | 63   | LAVVDPLFGMQPIR        | 1         | 1.22                        | 1.22                        | Asparagine synthetase [glutamine-hydrolyzing]                     |                                        |
| P14868    | 412   | 421  | QSNVDFMFR             | 1         | 2.68                        | 2.68                        | Aspartyl-tRNA synthetase, cytoplasmic                             |                                        |
| P25705    | 134   | 149  | TGAIVDVPVGEELLGR      | 1         | 1.52                        | 1.52                        | ATP synthase subunit alpha, mitochondrial precursor               |                                        |
| Q86XP3    | 548   | 560  | DIPVLVATDVAAR         | 1         | 0.81                        | 0.81                        | ATP-dependent RNA helicase DDX42                                  |                                        |
| P11586    | 761   | 772  | TDTSELDISR            | 2         | 0.86                        | 0.86                        | C-1-tetrahydrofolate synthase, cytoplasmic                        |                                        |
| O75534    | 65    | 77   | VGDDVEFVSSDR          | 2         | 1.13                        | 1.13                        | Cold shock domain-containing protein E1                           |                                        |
| P17812    | 467   | 477  | LYGDADYLEER           | 1         | 1.79                        | 1.79                        | CTP synthase 1                                                    |                                        |
| Q07065    | 229   | 240  | DFTSLENTVEER          | 1         | 1.01                        | 1.17                        | Cytoskeleton-associated protein 4                                 |                                        |
|           | 455   | 473  | LEGLGSSEADQDGLASTVR   | 2         | 1.34                        |                             |                                                                   |                                        |
| P49736    | 665   | 677  | DTVDPVQDEMLAR         | 1         | 2.25                        | 2.25                        | DNA replication licensing factor MCM2                             |                                        |
| P11387    | 559   | 567  | QPEDDLFDR             | 2         | 0.89                        | 0.89                        | DNA topoisomerase 1                                               |                                        |
| P31689    | 351   | 372  | EVEETDEMDQVELVDFDPNQR | 1         | 1.12                        | 1.12                        | DnaJ homolog subfamily A member 1                                 |                                        |
| Q9UBS4    | 207   | 217  | TLEVEIEPGR            | 1         | 0.92                        | 0.92                        | DnaJ homolog subfamily B member 11 precursor                      |                                        |
| P68104    | 256   | 266  | IGGIGTVPVGR           | 1         | 1.31                        | 1.31                        | Elongation factor 1-alpha 1                                       | Q05639, QSVTE0                         |
| P49411    | 92    | 102  | YEEDNAPeer            | 2         | 2.14                        | 1.56                        | Elongation factor Tu, mitochondrial precursor                     |                                        |
|           | 316   | 327  | AEAGDNLGALVR          | 2         | 0.98                        |                             |                                                                   |                                        |
| P60842    | 325   | 334  | VLIITDOLLAR           | 1         | 1.25                        | 1.25                        | Eukaryotic initiation factor 4A-I                                 | Q14240                                 |
| P05198    | 277   | 288  | VVTDTDETELAR          | 1         | 1.30                        | 1.30                        | Eukaryotic translation initiation factor 2 subunit 1              |                                        |
| P47756    | 182   | 195  | SGSGTMNLGGSLTR        | 1         | 2.14                        | 2.14                        | F-actin-capping protein subunit beta                              |                                        |
| P21333    | 64    | 76   | IANLQTDLSGLR          | 1         | 1.00                        | 1.12                        | Filamin-A                                                         |                                        |
|           | 428   | 437  | GTVEPQLER             | 1         | 1.01                        |                             |                                                                   |                                        |
|           | 1020  | 1032 | VEPGLGADNSVVR         | 1         | 0.95                        |                             |                                                                   |                                        |
|           | 1072  | 1087 | AFGPGQLGGSAGSPAR      | 2         | 1.51                        |                             |                                                                   |                                        |
| P04075    | 44    | 56   | LQSIGFENTEENR         | 1         | 1.17                        | 1.17                        | Fructose-bisphosphate aldolase A                                  |                                        |
| Q06210    | 164   | 176  | ESQDTSFTLVER          | 1         | 1.00                        | 1.00                        | Glucosamine-fructose-6-phosphate aminotransferase [isomerizing] 1 |                                        |
| P00367    | 125   | 136  | DDGSWEVIEGYR          | 1         | 0.91                        | 0.91                        | Glutamate dehydrogenase 1, mitochondrial precursor                | P49448                                 |
| P08107    | 37    | 49   | TPSYVAFTDTER          | 1         | 0.82                        | 0.82                        | Heat shock 70 kDa protein 1                                       | P11142, P17066, P34931, P48741, P54652 |
| P08238    | 73    | 82   | IDIIPNPQER            | 1         | 1.00                        | 1.00                        | Heat shock protein HSP 90-beta                                    | Q58FF7                                 |
| P61978    | 423   | 433  | IDEPLEGSEDR           | 1         | 1.17                        | 1.17                        | Heterogeneous nuclear ribonucleoprotein K                         |                                        |
| Q04695    | 322   | 334  | ASLEGNLAETENR         | 1         | 3.45                        | 3.45                        | Keratin, type I cytoskeletal 17                                   |                                        |
| P08729    | 215   | 226  | VDALNDEINFLR          | 1         | 0.94                        | 0.74                        | Keratin, type II cytoskeletal 7                                   |                                        |
|           | 332   | 342  | LEAAIAEAER            | 2         | 0.53                        |                             |                                                                   |                                        |
| P05787    | 329   | 341  | ASLEAAIAAEQR          | 2         | 1.24                        | 1.44                        | Keratin, type II cytoskeletal 8                                   |                                        |
|           | 353   | 362  | LSELEAALQR            | 1         | 1.65                        |                             |                                                                   |                                        |
| P02545    | 12    | 25   | SGAQASSTPLSPTR        | 2         | 1.26                        | 1.33                        | Lamin-A/C                                                         |                                        |
|           | 33    | 41   | EDLQELNDR             | 2         | 1.53                        |                             |                                                                   |                                        |
|           | 51    | 60   | SLETENAGLR            | 2         | 1.07                        |                             |                                                                   |                                        |
|           | 63    | 72   | ITESEEVVSR            | 1         | 1.55                        |                             |                                                                   |                                        |
|           | 79    | 89   | AAEAEALGDAR           | 1         | 1.40                        |                             |                                                                   |                                        |
|           | 157   | 166  | TLEGELHDLR            | 1         | 0.94                        |                             |                                                                   |                                        |
|           | 209   | 216  | NIYSEELR              | 1         | 1.99                        |                             |                                                                   |                                        |
|           | 241   | 249  | LADALQELR             | 1         | 1.41                        |                             |                                                                   |                                        |
|           | 281   | 296  | NSNLVGAHHEELQQSR      | 3         | 1.37                        |                             |                                                                   |                                        |
|           | 379   | 386  | LLEGEEER              | 1         | 0.58                        |                             |                                                                   |                                        |
|           | 472   | 482  | QNGDDPLLTyr           | 10        | 1.31                        |                             |                                                                   |                                        |
|           | 528   | 541  | TALINSTGEEVAMR        | 4         | 1.65                        |                             |                                                                   |                                        |
|           | 628   | 644  | SVGSGGGSGFDNLVTR      | 2         | 1.23                        |                             |                                                                   |                                        |
| P35579    | 1878  | 1888 | QLLEEAEAAQR           | 1         | 0.88                        | 0.88                        | Myosin-9                                                          |                                        |
| Q14697    | 115   | 127  | VPDVLVADPPPIAR        | 1         | 1.02                        | 1.02                        | Neutral alpha-glucosidase AB precursor                            |                                        |
| Q15233    | 76    | 91   | LFVGNLPPDITEEMR       | 9         | 1.17                        | 1.15                        | Non-POU domain-containing octamer-binding protein                 |                                        |
|           | 127   | 135  | VELDNMPLR             | 2         | 1.33                        |                             |                                                                   |                                        |
|           | 257   | 270  | FAQPGSFEYVAMR         | 2         | 1.06                        |                             |                                                                   |                                        |
|           | 294   | 304  | EKLEMEMEAAAR          | 1         | 1.11                        |                             |                                                                   |                                        |
| Q8WX93    | 384   | 398  | MGQMAMGGAMGINNR       | 4         | 1.07                        | 1.41                        | Palladin                                                          |                                        |
|           | 477   | 488  | QGSEIQDSPDFR          | 1         | 1.58                        |                             |                                                                   |                                        |
|           | 1240  | 1252 | LQNTGVADGYPVR         | 1         | 1.25                        |                             |                                                                   |                                        |

|        |     |     |                     |    |      |      |                                                                                          |                                                                                                                      |
|--------|-----|-----|---------------------|----|------|------|------------------------------------------------------------------------------------------|----------------------------------------------------------------------------------------------------------------------|
| O75400 | 777 | 789 | EPAFEDITLESER       | 2  | 1.25 | 1.25 | Pre-mRNA-processing factor 40 homolog A                                                  |                                                                                                                      |
| P17844 | 392 | 403 | APILIATDVASR        | 1  | 1.07 | 1.07 | Probable ATP-dependent RNA helicase DDX5                                                 | Q92841                                                                                                               |
| P49756 | 639 | 649 | FEDESDDVPR          | 1  | 1.59 | 1.59 | Probable RNA-binding protein 25                                                          |                                                                                                                      |
| P29590 | 412 | 424 | DPIDVDLPEEAER       | 1  | 1.25 | 1.25 | Probable transcription factor PML                                                        |                                                                                                                      |
| Q02809 | 431 | 441 | SEDVYDIVQGR         | 1  | 1.05 | 1.05 | Procollagen-lysine,2-oxoglutarate 5-dioxygenase 1 precursor                              |                                                                                                                      |
| P07737 | 76  | 89  | DSLLQDGEFSMDLR      | 5  | 0.98 | 0.98 | Profilin-1                                                                               |                                                                                                                      |
| P49257 | 351 | 360 | QLDMILDEQR          | 3  | 1.53 | 1.99 | Protein ERGIC-53 precursor                                                               |                                                                                                                      |
|        | 449 | 456 | DIDNLVQR            | 1  | 2.45 |      |                                                                                          |                                                                                                                      |
| Q15436 | 534 | 544 | AETEEGPDVLR         | 1  | 1.23 | 1.23 | Protein transport protein Sec23A                                                         |                                                                                                                      |
| Q9P035 | 133 | 146 | LESEGSPETLTNLR      | 1  | 1.12 | 1.12 | Protein tyrosine phosphatase-like protein PTPLAD1                                        |                                                                                                                      |
| O43143 | 235 | 243 | YMTDGMILLR          | 1  | 1.64 | 1.34 | Putative pre-mRNA-splicing factor ATP-dependent RNA helicase DHX15                       | O60231,                                                                                                              |
|        | 244 | 253 | EAMNDPILLR          | 1  | 1.21 |      |                                                                                          | Q14562                                                                                                               |
|        | 492 | 504 | TEMQDNTYPEILR       | 1  | 1.18 |      |                                                                                          |                                                                                                                      |
| A6NKZ8 | 170 | 179 | FPGQLNADLR          | 1  | 1.17 | 1.17 | Putative tubulin beta chain-like protein ENSP00000290377                                 | A6NNZ2,<br>P04350,<br>P07437,<br>P68371,<br>Q13509,<br>Q13885,<br>Q3ZCM7,<br>Q99867,<br>Q9BVF5,<br>Q9BVA1,<br>Q9H4B7 |
| P08559 | 46  | 58  | LEEGPPVTVLTR        | 1  | 0.92 | 0.92 | Pyruvate dehydrogenase E1 component subunit alpha, somatic form, mitochondrial precursor |                                                                                                                      |
| P14618 | 33  | 43  | LDIDSPPIAR          | 1  | 1.51 | 1.65 | Pyruvate kinase isozymes M1/M2                                                           |                                                                                                                      |
|        | 93  | 106 | TATESFASDPILYR      | 2  | 1.45 |      |                                                                                          |                                                                                                                      |
|        | 368 | 376 | GDYPLEAVR           | 2  | 2.58 |      |                                                                                          |                                                                                                                      |
|        | 476 | 489 | DPVQEAWAEDVDLR      | 1  | 1.06 |      |                                                                                          |                                                                                                                      |
| P46060 | 192 | 205 | LENDGATALAEAFR      | 1  | 0.83 | 0.83 | Ran GTPase-activating protein 1                                                          |                                                                                                                      |
| Q96EV2 | 786 | 798 | TETFFPDEEETR        | 1  | 1.55 | 1.55 | RNA-binding protein 33                                                                   |                                                                                                                      |
| P63165 | 55  | 63  | QGVPMNLSR           | 10 | 0.54 | 0.65 | Small ubiquitin-related modifier 1 precursor                                             |                                                                                                                      |
|        | 64  | 70  | FLFEGQR             | 4  | 0.76 |      |                                                                                          |                                                                                                                      |
| Q13126 | 12  | 29  | IGIIGGTGLDDPEILEGR  | 1  | 1.30 | 1.15 | S-methyl-5'-thioadenosine phosphorylase                                                  |                                                                                                                      |
|        | 272 | 282 | NMAQFSVLLPR         | 1  | 1.00 |      |                                                                                          |                                                                                                                      |
| Q9Y6M7 | 138 | 148 | FEEDVEDGGDR         | 1  | 2.46 | 2.46 | Sodium bicarbonate cotransporter 3                                                       |                                                                                                                      |
| Q15637 | 228 | 240 | QGIETPEDQNDLR       | 3  | 1.07 | 1.07 | Splicing factor 1                                                                        |                                                                                                                      |
| Q13435 | 112 | 123 | VGEPValseeER        | 1  | 0.91 | 0.91 | Splicing factor 3B subunit 2                                                             |                                                                                                                      |
| P23246 | 33  | 44  | SPPPGMGLNQNR        | 1  | 1.38 | 1.06 | Splicing factor, proline- and glutamine-rich                                             |                                                                                                                      |
|        | 350 | 358 | AELDDTPMR           | 2  | 1.03 |      |                                                                                          |                                                                                                                      |
|        | 400 | 407 | AVVIVDDR            | 1  | 0.96 |      |                                                                                          |                                                                                                                      |
|        | 667 | 681 | FGQGGAGPVGGQGPR     | 1  | 0.86 |      |                                                                                          |                                                                                                                      |
| Q9UBT2 | 108 | 119 | QFILVMNALDNR        | 1  | 0.83 | 0.83 | SUMO-activating enzyme subunit 2                                                         |                                                                                                                      |
| Q9B526 | 271 | 285 | EDTESLEIFQNEVAR     | 2  | 1.93 | 1.93 | Thioredoxin domain-containing protein 4 precursor                                        |                                                                                                                      |
| P52657 | 43  | 51  | AINAALAQK           | 1  | 0.85 | 0.85 | Transcription initiation factor IIA subunit 2                                            |                                                                                                                      |
| P25490 | 110 | 122 | EEVGGDDSDGLR        | 4  | 0.95 | 0.95 | Transcriptional repressor protein YY1                                                    |                                                                                                                      |
| P29401 | 284 | 302 | ILATPPQEDAPSVDIANIR | 1  | 0.88 | 0.88 | Transketolase                                                                            |                                                                                                                      |
| P68363 | 65  | 79  | AVFVDLEPTVIDEVR     | 1  | 1.14 | 2.08 | Tubulin alpha-1B chain                                                                   | Q71U36,<br>Q9BQE3                                                                                                    |
|        | 113 | 121 | EIIDLVLDK           | 1  | 3.03 |      |                                                                                          | Q71U36,<br>Q9BQE3                                                                                                    |
| P07437 | 63  | 77  | AILVDLEPGTMDSVR     | 1  | 0.94 | 0.94 | Tubulin beta chain                                                                       | Q13509,<br>Q13885,<br>Q9BVA1                                                                                         |
| Q9Y310 | 322 | 329 | SSMTFLTR            | 1  | 1.21 | 1.21 | UPF0027 protein C22orf28                                                                 |                                                                                                                      |
| P08670 | 105 | 113 | VELQELNDR           | 1  | 1.22 | 1.00 | Vimentin                                                                                 | P17661                                                                                                               |
|        | 197 | 207 | EEAENTLQSFK         | 2  | 0.79 |      |                                                                                          |                                                                                                                      |
| Q8NEW0 | 92  | 102 | DNDAFSYGYVR         | 1  | 0.93 | 0.93 | Zinc transporter 7                                                                       |                                                                                                                      |

Proteins are ordered alphabetically by protein name and then by increasing start position of the identified peptide. Columns from left to right contain the Uniprot accession number, the start and end position of the identified peptide in the protein sequence, the identified peptide, the number of MS/MS spectra by which the peptide was identified, the average light/heavy (=uninfected/infected) peptide ratio, the average light/heavy (=uninfected/infected) protein ratio, the protein name and possible protein isoforms indicating protein accessions in which the same peptide sequence was found.

**Supplementary Table 2 : List of quantified proteins from the SILAC/SUMO2 experiment.**

| Accession | Start | End           | Sequence              | # spectra | peptide ratio (light/heavy) | protein ratio (light/heavy) | Protein name                                                      | isoforms                               |
|-----------|-------|---------------|-----------------------|-----------|-----------------------------|-----------------------------|-------------------------------------------------------------------|----------------------------------------|
| P23396    | 28    | 40            | ELAEDYSGVEVR          | 1         | 0.60                        | 0.60                        | 40S ribosomal protein S3                                          |                                        |
| P46776    | 95    | 105           | TGAAPIDVVR            | 4         | 1.29                        | 1.29                        | 60S ribosomal protein L27a                                        |                                        |
| P52209    | 120   | 136           | GILFVSGVSGGEEGAR      | 1         | 0.64                        | 0.64                        | 6-phosphogluconate dehydrogenase, decarboxylating                 |                                        |
| P11021    | 186   | 197           | DAGTIAGLNVMR          | 1         | 1.32                        | 1.32                        | 78 kDa glucose-regulated protein precursor                        |                                        |
| P23526    | 21    | 34            | ALDIAENMPGLMR         | 1         | 1.56                        | 1.56                        | Adenosylhomocysteinase                                            |                                        |
| O43488    | 51    | 61            | MDAPASAAVVR           | 1         | 2.69                        | 2.69                        | Aflatoxin B1 aldehyde reductase member 2                          |                                        |
| O43707    | 240   | 255           | MLDAEDIVNTARPDEK      | 1         | 1.55                        | 1.55                        | Alpha-actinin-4                                                   |                                        |
| A5A3E0    | 1060  | 1072          | QEYDESGPSIVHR         | 2         | 1.13                        | 1.13                        | ANKRD26-like family C member 1B                                   | P60709, P63261, Q658J3, Q9BYX7         |
| P14868    | 111   | 121           | ESIVDVEGVVR           | 1         | 2.41                        | 2.41                        | Aspartyl-tRNA synthetase, cytoplasmic                             |                                        |
| Q92499    | 506   | 514           | MDQAIIFCR             | 1         | 1.12                        | 1.12                        | ATP-dependent RNA helicase DDX1                                   |                                        |
| Q86XP3    | 548   | 560           | DIPVLVATDVAAR         | 1         | 1.32                        | 1.38                        | ATP-dependent RNA helicase DDX42                                  |                                        |
|           | 606   | 615           | DSNFAGDLVLR           | 1         | 1.43                        |                             |                                                                   |                                        |
| P11586    | 505   | 517           | TDPTTLTDEEINR         | 1         | 2.17                        | 2.17                        | C-1-tetrahydrofolate synthase, cytoplasmic                        |                                        |
| P48730    | 376   | 389           | GAPVNISSDLTGR         | 1         | 0.65                        | 0.65                        | Casein kinase I isoform delta                                     |                                        |
| Q13409    | 92    | 112           | SVSTPSEAGSQDSGDGAVGSR | 1         | 2.00                        | 2.00                        | Cytoplasmic dynein 1 intermediate chain 2                         |                                        |
| Q07065    | 147   | 161           | QREFLGGQLQGVQEK       | 1         | 1.13                        | 1.13                        | Cytoskeleton-associated protein 4                                 |                                        |
| O43175    | 76    | 90            | AGTGVDNVLDAAATR       | 1         | 1.43                        | 1.43                        | D-3-phosphoglycerate dehydrogenase                                |                                        |
| P49736    | 665   | 677           | DTVDPVQDEMLAR         | 2         | 2.76                        | 2.76                        | DNA replication licensing factor MCM2                             |                                        |
|           | 92    | 102           | YEEIDNAPEER           | 1         | 1.54                        | 1.59                        | Elongation factor Tu, mitochondrial precursor                     |                                        |
| 316       | 327   | AEAGDNLGALVLR | 1                     | 1.63      |                             |                             |                                                                   |                                        |
| P60842    | 178   | 190           | MFVLDEADEMLSR         | 1         | 1.49                        | 1.49                        | Eukaryotic initiation factor 4A-I                                 | Q14240                                 |
| P21333    | 64    | 76            | IANLQTDLSGDLR         | 1         | 0.51                        | 1.29                        | Filamin-A                                                         |                                        |
|           | 1297  | 1312          | VANPSGNLTETYVQDR      | 1         | 1.93                        |                             |                                                                   |                                        |
|           | 1453  | 1464          | CSGPGLSGPMVLR         | 1         | 1.42                        |                             |                                                                   |                                        |
| Q06210    | 346   | 359           | EIFEQPEVVNTMR         | 1         | 1.62                        | 1.62                        | Glucosamine-fructose-6-phosphate aminotransferase [isomerizing] 1 |                                        |
| P00367    | 213   | 231           | GFIGPGIDVPAPDMSTGER   | 1         | 1.71                        | 1.71                        | Glutamate dehydrogenase 1, mitochondrial precursor                |                                        |
| P21266    | 74    | 82            | ITQSNAILR             | 1         | 0.51                        | 0.51                        | Glutathione S-transferase Mu 3                                    | P28161, P46439                         |
| P08107    | 26    | 36            | VEIANDQGNR            | 1         | 0.81                        | 0.91                        | Heat shock 70 kDa protein 1                                       | P11021, P11142, P34931, P54652         |
|           | 37    | 49            | TTPSYVAFTDTER         | 1         | 1.01                        |                             |                                                                   | P11142, P17066, P34931, P48741, P54652 |
| P11142    | 160   | 171           | DAGTIAGLNVLR          | 1         | 1.15                        | 1.15                        | Heat shock cognate 71 kDa protein                                 |                                        |
| P61978    | 423   | 433           | IDEPLEGSEDR           | 1         | 1.03                        | 1.03                        | Heterogeneous nuclear ribonucleoprotein K                         |                                        |
| O00470    | 181   | 190           | MPIDLVIDDR            | 1         | 1.35                        | 1.35                        | Homeobox protein Meis1                                            |                                        |
| P02533    | 224   | 232           | VLEDELTLAR            | 1         | 1.57                        | 1.57                        | Keratin, type I cytoskeletal 14                                   | P08727, P08779, P19012, Q04695         |
| Q04695    | 31    | 41            | LSGGLGAGSCR           | 1         | 1.25                        | 1.34                        | Keratin, type I cytoskeletal 17                                   |                                        |
|           | 322   | 334           | ASLEGNLAETENR         | 1         | 0.85                        |                             |                                                                   |                                        |
|           | 377   | 385           | LEQEIATYR             | 1         | 1.93                        |                             |                                                                   |                                        |
| P05787    | 329   | 341           | ASLEAAIADAEQR         | 1         | 0.63                        | 0.63                        | Keratin, type II cytoskeletal 8                                   |                                        |
| P02545    | 12    | 25            | SGAQASSTPLSPTR        | 2         | 1.39                        | 1.27                        | Lamin-A/C                                                         |                                        |
|           | 29    | 41            | LQEKEDLQELNDR         | 1         | 1.10                        |                             |                                                                   |                                        |
|           | 33    | 41            | EDLQELNDR             | 6         | 1.14                        |                             |                                                                   |                                        |
|           | 51    | 60            | SLETENAGLR            | 2         | 1.31                        |                             |                                                                   |                                        |
|           | 63    | 72            | ITSEEVVSR             | 12        | 1.42                        |                             |                                                                   |                                        |
|           | 79    | 89            | AAYEAEELGDAR          | 2         | 1.27                        |                             |                                                                   |                                        |
|           | 124   | 133           | EGDLIAAQAR            | 2         | 0.98                        |                             |                                                                   |                                        |
|           | 181   | 189           | KQLQDEMLR             | 1         | 2.74                        |                             |                                                                   |                                        |
|           | 182   | 189           | QLQDEMLR              | 3         | 1.21                        |                             |                                                                   |                                        |
|           | 209   | 216           | NIYSEELR              | 1         | 0.90                        |                             |                                                                   |                                        |
|           | 241   | 249           | LADALQELR             | 4         | 1.24                        |                             |                                                                   |                                        |
|           | 322   | 329           | DLEDLAR               | 1         | 1.41                        |                             |                                                                   |                                        |
|           | 379   | 386           | LLEGEER               | 1         | 1.11                        |                             |                                                                   | P20700, Q03252                         |
|           | 472   | 482           | QNGDDPLTYR            | 9         | 1.24                        |                             |                                                                   |                                        |



|        |      |      |                     |   |      |      |                                                                                          |                              |
|--------|------|------|---------------------|---|------|------|------------------------------------------------------------------------------------------|------------------------------|
|        | 528  | 541  | TALINSTGEEVAMR      | 4 | 0.65 |      |                                                                                          |                              |
|        | 628  | 644  | SVGGSGGSGFDNLVTR    | 2 | 1.19 |      |                                                                                          |                              |
| Q14847 | 60   | 73   | QSFTMVAADTPENLR     | 1 | 0.61 | 0.61 | LIM and SH3 domain protein 1                                                             |                              |
| P00338 | 158  | 169  | VIGSGCNLSAR         | 1 | 1.52 | 1.14 | L-lactate dehydrogenase A chain                                                          | P07195,<br>P07864,<br>Q6ZMR3 |
|        | 306  | 315  | VTLTSEEAR           | 3 | 0.77 |      |                                                                                          |                              |
| Q14697 | 192  | 206  | DPAEGDGAQPEETPR     | 1 | 1.22 | 1.22 | Neutral alpha-glucosidase AB precursor                                                   |                              |
|        | 76   | 91   | LFVGNLPPDITEEMR     | 4 | 1.10 |      |                                                                                          |                              |
| Q15233 | 127  | 135  | VELDNMPLR           | 1 | 1.17 | 1.67 | Non-POU domain-containing octamer-binding protein                                        |                              |
|        | 457  | 468  | AAPGAEFAPNKR        | 1 | 2.75 |      |                                                                                          |                              |
| Q72417 | 92   | 104  | TGYGELNGAGER        | 2 | 1.17 | 1.02 | Nuclear fragile X mental retardation-interacting protein 2                               |                              |
|        | 110  | 122  | NLSSDEATNPISR       | 1 | 0.87 | 1.02 |                                                                                          |                              |
| Q965T3 | 156  | 167  | SQSIDTPGVISR        | 1 | 0.53 | 0.53 | Paired amphipathic helix protein Sin3a                                                   |                              |
|        | 477  | 488  | QGSEIQSDPDR         | 1 | 0.64 |      |                                                                                          |                              |
| Q8WX93 | 1090 | 1098 | LMVQAVNQR           | 1 | 1.84 | 1.16 | Palladin                                                                                 |                              |
|        | 1240 | 1252 | LQNTGVADGYPVR       | 3 | 1.01 |      |                                                                                          |                              |
| Q8WXF1 | 105  | 115  | YGEPSEVFINR         | 1 | 1.14 | 1.14 | Paraspeckle component 1                                                                  |                              |
| Q96HC4 | 306  | 324  | ANNSQEPSPQLASSVASTR | 1 | 2.38 | 2.38 | PDZ and LIM domain protein 5                                                             |                              |
| Q8WUA2 | 48   | 61   | DFIIQTGDPTGTGR      | 2 | 1.24 | 1.24 | Peptidyl-prolyl cis-trans isomerase-like 4                                               |                              |
| Q06830 | 141  | 151  | QITVNDLPVGR         | 1 | 0.89 | 0.89 | Peroxisomal protein 1                                                                    | P32119                       |
| Q9NSD9 | 537  | 547  | ASEGPAFFPGR         | 1 | 0.49 | 0.49 | Phenylalanyl-tRNA synthetase beta chain                                                  |                              |
| O15067 | 528  | 541  | ELSDPAGAIYTSR       | 1 | 0.86 | 0.86 | Phosphoribosylformylglycinamide synthase                                                 |                              |
| O75400 | 777  | 789  | EPAFEDITLESER       | 1 | 2.31 | 2.31 | Pre-mRNA-processing factor 40 homolog A                                                  |                              |
| P07737 | 76   | 89   | DSLLQDGEFSMDLR      | 3 | 0.90 | 0.90 | Profilin-1                                                                               |                              |
|        | 351  | 360  | QLDMILDEQR          | 4 | 1.49 |      |                                                                                          |                              |
| P49257 | 449  | 456  | DIDNLVQR            | 1 | 2.15 | 1.82 | Protein ERGIC-53 precursor                                                               |                              |
| Q96RT1 | 1116 | 1125 | TPPMMPGSQR          | 1 | 1.00 | 1.00 | Protein LAP2                                                                             |                              |
| P55735 | 44   | 54   | NGGQILIADLR         | 1 | 2.05 | 2.05 | Protein SEC13 homolog                                                                    |                              |
| Q9P035 | 133  | 146  | LESEGPSPTLNLNR      | 3 | 0.98 | 0.98 | Protein tyrosine phosphatase-like protein PTPLAD1                                        |                              |
| O95070 | 251  | 265  | TAALGPDSMGGPVPR     | 1 | 1.51 | 1.51 | Protein YIF1A                                                                            |                              |
| Q7L2E3 | 587  | 598  | LVLMSATGDNER        | 1 | 1.75 | 1.75 | Putative ATP-dependent RNA helicase DHX30                                                |                              |
|        | 146  | 152  | FTDILVR             | 2 | 1.60 |      |                                                                                          |                              |
|        | 187  | 194  | GVACTQPR            | 1 | 2.78 |      |                                                                                          |                              |
| O43143 | 235  | 243  | YMTDGMILLR          | 3 | 1.29 | 1.61 | Putative pre-mRNA-splicing factor ATP-dependent RNA helicase DHX15                       | O60231,<br>Q14562            |
|        | 244  | 253  | EAMNDPLLR           | 2 | 1.09 |      |                                                                                          |                              |
|        | 492  | 504  | TEMQDNTYPEILR       | 3 | 1.29 |      |                                                                                          |                              |
| P11498 | 929  | 942  | AEAEAAQEELSFPR      | 1 | 1.42 | 1.42 | Pyruvate carboxylase, mitochondrial precursor                                            |                              |
| P08559 | 46   | 58   | LEEGPPVTTLVTR       | 3 | 0.82 | 0.82 | Pyruvate dehydrogenase E1 component subunit alpha, somatic form, mitochondrial precursor |                              |
| P14618 | 33   | 43   | LDIDSPPTAR          | 2 | 1.38 | 1.35 | Pyruvate kinase isozymes M1/M2                                                           |                              |
|        | 368  | 376  | GDYPLEAVR           | 2 | 1.31 |      |                                                                                          |                              |
| P46060 | 44   | 55   | EIEDFDSLEALR        | 1 | 1.02 | 1.02 | Ran GTPase-activating protein 1                                                          |                              |
| Q96EV2 | 786  | 798  | TETEFPDEEETR        | 1 | 1.00 | 1.00 | RNA-binding protein 33                                                                   |                              |
| Q99985 | 56   | 65   | ILLMDEQDR           | 1 | 2.22 | 2.22 | Semaphorin-3C precursor                                                                  |                              |
| Q13126 | 100  | 116  | EEIQPGDIVIQDFDR     | 2 | 0.88 | 0.88 | S-methyl-5'-thioadenosine phosphorylase                                                  |                              |
| Q15637 | 228  | 240  | QGIETPEDQNDLR       | 2 | 1.34 | 1.34 | Splicing factor 1                                                                        |                              |
| Q13435 | 112  | 123  | VGEPValseeer        | 1 | 1.40 | 1.17 | Splicing factor 3B subunit 2                                                             |                              |
|        | 126  | 140  | LAQQQAALLMQQEER     | 1 | 0.95 |      |                                                                                          |                              |
|        | 280  | 286  | ANLSLLR             | 1 | 1.14 |      |                                                                                          |                              |
| P23246 | 400  | 407  | AVVIVDDR            | 1 | 1.24 | 1.32 | Splicing factor, proline- and glutamine-rich                                             | Q15233                       |
|        | 431  | 443  | CSEGVFLTTTPR        | 3 | 1.64 |      |                                                                                          |                              |
|        | 667  | 681  | FGQGGAGPVGGQGP      | 2 | 1.27 |      |                                                                                          |                              |
| Q98526 | 141  | 148  | SDPIQEIR            | 1 | 0.70 | 0.98 | Thioredoxin domain-containing protein 4 precursor                                        |                              |
|        | 149  | 158  | DLAEITLDR           | 1 | 1.19 |      |                                                                                          |                              |
|        | 271  | 285  | EDTESLEIFQNEVAR     | 1 | 1.05 |      |                                                                                          |                              |
| P52657 | 43   | 51   | AINAALAQR           | 1 | 1.77 | 1.77 | Transcription initiation factor IIA subunit 2                                            |                              |
| P25490 | 110  | 122  | EEVVGDDSDGLR        | 1 | 1.31 | 1.31 | Transcriptional repressor protein YY1                                                    |                              |
| Q9UNL2 | 9    | 22   | QQSEEDLLQDFSR       | 1 | 0.71 | 0.71 | Translocon-associated protein subunit gamma                                              |                              |
| Q14166 | 241  | 252  | DFAYGETDPLIR        | 1 | 1.57 | 1.57 | Tubulin-tyrosine ligase-like protein 12                                                  |                              |
|        | 105  | 113  | VELQELNDR           | 2 | 1.19 |      |                                                                                          |                              |
| P08670 | 197  | 207  | EEAENTLQSF          | 1 | 1.06 | 1.07 | Vimentin                                                                                 | P17661                       |
|        | 295  | 304  | FADLSEAANR          | 1 | 0.96 |      |                                                                                          |                              |
| O75083 | 371  | 389  | MTVDESGQLISCSMDDTVR | 1 | 1.42 | 1.42 | WD repeat-containing protein 1                                                           |                              |
| Q9BV38 | 402  | 410  | VTELEDEV            | 2 | 0.71 | 0.71 | WD repeat-containing protein 18                                                          |                              |
| Q9Y6M5 | 204  | 213  | LDPADPENPR          | 1 | 1.05 | 1.05 | Zinc transporter 1                                                                       |                              |
| Q8NEW0 | 340  | 349  | LIVAPDADAR          | 1 | 0.69 | 0.69 | Zinc transporter 7                                                                       |                              |

Columns from left to right contain the same information as Supplementary Table 1.

**Supplementary Table 3 : Hemolytic activities and membrane binding efficiencies of LLO variants.**

| LLO   | Hemolytic activity (HU/ $\mu$ g) <sup>a</sup> | Binding efficiency (%) <sup>b</sup> |
|-------|-----------------------------------------------|-------------------------------------|
| WT    | 67 $\pm$ 17                                   | 100                                 |
| C484A | 19 $\pm$ 5                                    | 109 $\pm$ 4                         |
| Y206A | 6 $\pm$ 1                                     | 93 $\pm$ 8                          |
| W492A | <1                                            | 104 $\pm$ 10                        |

<sup>a</sup> Hemolytic activities of wild-type LLO and LLO variants were determined as previously described<sup>4</sup>. Briefly, sheep red blood cells (RBCs) were incubated with serial dilutions of wild-type LLO or LLO variants. After 1 hour incubation at 37°C, the percentage of RBCs lysis was estimated by measuring the OD<sub>540</sub> of the cells supernatant. One hemolytic units (HU) corresponds to the quantity of toxin leading to the complete lysis of 1.5x10<sup>8</sup> RBCs (means  $\pm$  standard deviations from 3 independent experiments are indicated).

<sup>b</sup> Binding efficiencies of wild type LLO and LLO variants. 10<sup>6</sup> sheep red blood cells were incubated with 1  $\mu$ g of wild type or mutant LLO for 30 min at room temperature. Cells were then lysed in 10 mM Na-phosphate buffer pH 7.4 and centrifuged 10 min at 1000 rpm. Supernatants containing red blood cell membranes were then ultracentrifuged 1 h at 200 000 rpm at 4°C to pellet cellular membranes. Pellets were then washed in 10 mM Na-phosphate buffer pH 7.4 and ultracentrifuged again 1 h at 200 000 rpm at 4°C. Finally, pellets were resuspended in Laemmli buffer, loaded for SDS-PAGE, and immunoblotted using a polyclonal rabbit anti-LLO antiserum. Binding efficiencies, corresponding to the proportion of LLO recovered in the pellet fractions, are indicated as percentage of wild-type LLO binding efficiency (means  $\pm$  standard deviations from 3 independent experiments are indicated).

## SUPPLEMENTARY REFERENCES

- 1 Braun, L. *et al.* InIB: an invasion protein of *Listeria monocytogenes* with a novel type of surface association. *Mol. Microbiol.* **25**, 285-294 (1997)
- 2 Hamon, M. A. *et al.* Histone modifications induced by a family of bacterial toxins. *Proc. Natl Acad. Sci. USA* **104**, 13467-13472 (2007).
- 3 Schmeck, B. *et al.* Intracellular bacteria differentially regulated endothelial cytokine release by MAPK-dependent histone modification. *J. Immunol.* **175**, 2843-2850 (2005).
- 4 Michel, E., Reich, K. A., Favier, R., Berche, P. & Cossart, P. Attenuated mutants of the intracellular bacterium *Listeria monocytogenes* obtained by single amino acid substitutions in listeriolysin O. *Mol. Microbiol.* **4**, 2167-2178 (1990).
